# Supplementary material for: ATRT–SHH comprises three molecular subgroups with characteristic clinical and histopathological features and prognostic significance
Source: PubMed Central journal article supplement (PMC9107423; doi:10.1007/s00401-022-02424-5), 2022-04-30
Supplement: 401_2022_2424_MOESM4_ESM.pdf [file 401_2022_2424_MOESM4_ESM.pdf]

**Supplemental Table 3: Multivariate Analysis (Cox Regression model).**

| Variable |                    | B      | SE   | Wald  | P    | Exp(B) |
|----------|--------------------|--------|------|-------|------|--------|
| Step 1   | Molecular Subgroup | .356   | .193 | 3.405 | .065 | 1.427  |
|          | Age                | -1.494 | .629 | 5.632 | .018 | .225   |
|          | ASCL1              | -.249  | .206 | 1.468 | .226 | .779   |
| Step 2   | Molecular Subgroup | .311   | .189 | 2.712 | .100 | 1.365  |
|          | Age                | -1.617 | .621 | 6.785 | .009 | .199   |

| Step | -2 Log-Likelihood | Change previous step |    |      | Change previous block |    |      |
|------|-------------------|----------------------|----|------|-----------------------|----|------|
|      |                   | Chi-square           | df | P    | Chi-square            | df | P    |
| 1    | 199.316           | 12.245               | 3  | .007 | 13.046                | 3  | .005 |
| 2    | 200.800           | 10.684               | 2  | .005 | 1.485                 | 1  | .223 |
